# Supplementary material for: BAM15 Relieves Neurodegeneration in Aged Caenorhabditis elegans and Extends Lifespan
Source: MDPI journal article supplement (doi:10.3390/metabo12111129), 2022-11-17
Supplement: s1 [file s1]

**DNP**  
**Pka: 4.09**  
**LogP: 1.67**

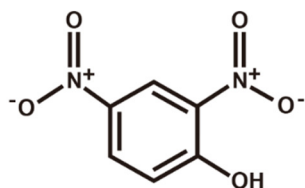

**Bam 15**  
**Pka: 7.56**  
**LogP: 6.52**

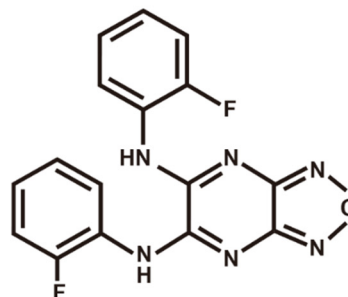

**Supplement Figures 1:** Chemical structure and properties of BAM15 as a mitochondrial uncoupler. The acid dissociation constant (pKa) and LogP value are presented. DNP, 2,4-dinitrophenol; BAM15, (2-fluorophenyl){6-[(2-fluorophenyl)amino](1,2,5-oxadiazolo[3,4-e]pyrazine-5-yl)}amine.

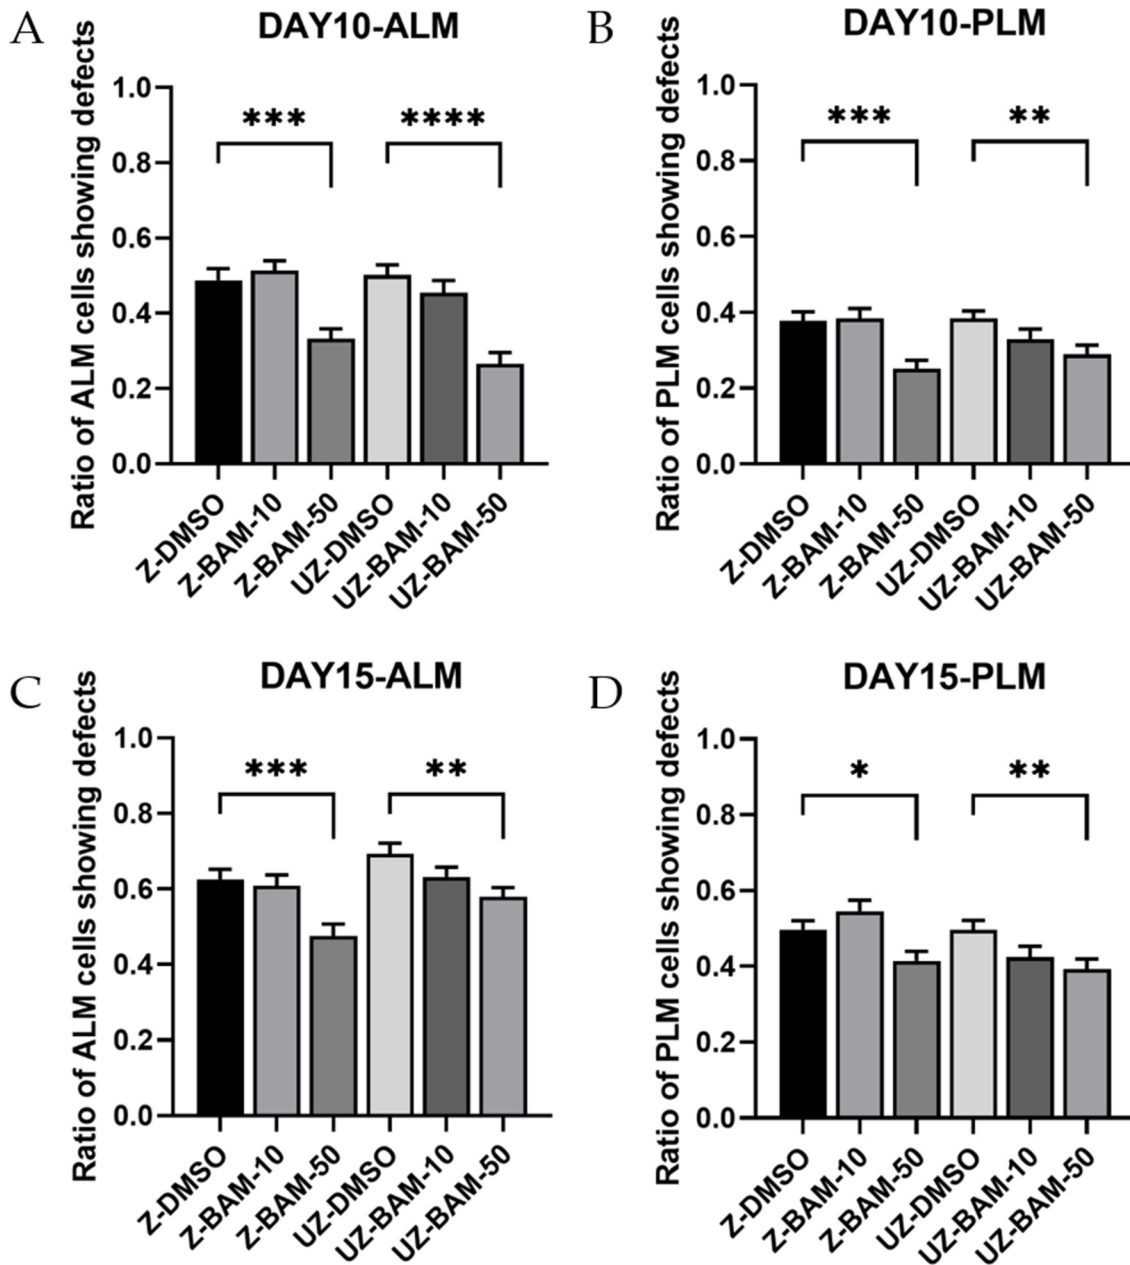

**Supplement Figures 2.** 50  $\mu$ M BAM15 reduced more neuronal defects than 10  $\mu$ M BAM15. (A–D) ALM and PLM neuronal defects are presented as a ratio of the total ALM- and PLM- scored neurons in animals treated with 10  $\mu$ M BAM15 and 50  $\mu$ M BAM15 on day-10 (A and B) and 15 (C and D). Z-DMSO, DMSO control in *zdl5*; Z-BAM-10, 10  $\mu$ M BAM15 treatment in *zdl5*; Z-BAM-50, 50  $\mu$ M BAM15 treatment in *zdl5*; UZ-DMSO, *ucp-4; zdl5* treated with DMSO; UZ-BAM-10, *ucp-4; zdl5* treated with 10  $\mu$ M BAM15; UZ-BAM-50, *ucp-4; zdl5* treated with 50  $\mu$ M BAM15. Error bars represent the SEM.  $n = 80\sim100$  worms per treatment in each experiment. \* $p < 0.05$ , \*\* $p < 0.01$ , \*\*\* $p < 0.001$ , \*\*\*\* $p < 0.0001$ . Unpaired Student's *t*-tests were performed to compare DMSO control and treatments.
